1 **Experiences of cervical cancer survivors in Chitwan, Nepal:**  
2 **a qualitative study**

3 Gambhir Shrestha<sup>1\*</sup>, Rashmi Mulmi<sup>1</sup>, Prabin Phuyal<sup>2</sup>, Rahul Kumar Thakur<sup>2</sup>, Bhola Siwakoti<sup>1</sup>

4

5 <sup>1</sup>Department of Cancer Prevention, Control and Research, B.P. Koirala Memorial Cancer

6 Hospital, Bharatpur, Chitwan, Nepal

7 <sup>2</sup>B.P. Koirala Institute of Health Sciences, Dharan, Sunsari, Nepal

8

9

10 \*Corresponding author

11 Email: [gamvir.stha@gmail.com](mailto:gamvir.stha@gmail.com) (GS)

12

13

## 14 **Abstract**

### 15 **Introduction**

16 Cervical cancer is a global leading cause of morbidity and mortality. The majority of cervical  
17 cancer deaths occur in developing countries including Nepal. Though knowledge of cervical  
18 cancer is an important determinant of women's participation in prevention and screening for  
19 cervical cancer, little is known about this topic in Nepal. This study explores the experiences of  
20 cervical cancer survivors and assesses the attitude of family and community towards it and  
21 stigma related to this disease in Bharatpur, Nepal.

22

### 23 **Methods**

24 The study design is qualitative methods involving two focus-group discussions. A total of 17  
25 cervical cancer survivors were selected purposively from Chitwan. All qualitative data were  
26 transcribed and translated into English and were thematically analyzed.

27

### 28 **Results**

29 Majority of the participants had scant knowledge about cervical cancer, its causative agent,  
30 showed less cervical cancer screening, delayed healthcare-seeking behavior despite having  
31 persistent symptoms before the diagnosis. The main reasons identified for not uptaking the  
32 cervical screening methods are an embarrassment and having no symptoms at all. Most of them  
33 endured social stigma related to cervical cancer in the form of physical isolation and verbal  
34 abuse.

35

### 36 **Conclusions**

37 There is an urgent need for interventions to make women and the public aware of cervical cancer  
38 and launch effective health education campaigns, policies for cervical cancer prevention  
39 programs. This implementation can save the lives of hundreds of women and help them avoid  
40 going through all the negative experiences related to cervical cancer. More studies are required  
41 to gain the perspectives, knowledge, experiences, and attitudes of cervical cancer survivors to  
42 add to the research.

43

44

45

46

## 47 **Introduction**

48 Cervical cancer is the second most common cancer in females from low-to-middle-income  
49 countries. Around 310,000 deaths occur annually due to cervical cancer [1]. Human  
50 papillomavirus (HPV) infection is the major cause of cervical cancer. Although most cases of HPV  
51 will resolve on their own, persistent infection with certain types of HPV (types 16 and 18) on the  
52 cervix can lead to precancerous lesions that can progress to cervical cancer [2]. Nepal has a  
53 population of 10.1 million women aged 15 years and older who are at higher risk of acquiring  
54 cervical cancer. Cervical cancer is the most frequent cancer among women between 15-44 years  
55 of age and it also ranks as 1<sup>st</sup> most frequent cancer among women in Nepal. According to the latest  
56 data around 1928 women die yearly out of a total of 2942 women who are diagnosed with cervical  
57 cancer yearly in Nepal [3].

58 Early detection of HPV infection through the utilization of Papanicolaou (Pap) testing has been  
59 shown to decrease rates of cervical cancer. Because of restricted access to the health care facility  
60 and limited knowledge about the preventive techniques for cervical malignancy, the greater part  
61 of the women in Nepal has never had a pap test in entire life. Women have reported a lack of  
62 knowledge of Pap tests, limited health care facilities, lack of time and money, logistics barriers,  
63 and lack of social support as obstacles to receiving regular Pap tests. Since majority of people with  
64 stage 1 cervical cancer is cured by therapy, it is significantly important to focus on the methods to  
65 improvise the quality of life of such patients. The five-year survival rate for cervical cancer is  
66 around 68%, in developed countries, but is very less in developing countries [4].

67 Females diagnosed with cervical cancer in Nepal often face many difficulties associated with  
68 cancer itself, cancer treatments and their side-effects, social understandings, and monetary

69 constraints, among others. With a very strong association of cervical cancer with sexual practices  
70 in women, cervical cancer has a very strong impact on the quality of life of cancer survivors. Social  
71 shame and the absence of satisfactory information concerning the improvement of the cervical  
72 disease have supported a low quality of life in Nepal. Besides, cervical cancer patients have been  
73 found to have more terrible personal satisfaction scores when contrasted with everyone as well as  
74 when contrasted with other gynecological malignancy survivors [5].

75 A very minimal subjective investigation has been done to draw out the experience of the  
76 malignancy survivor in Nepal. The objective of the study is to understand how a survivor of  
77 cervical cancer and their caregivers understood, experienced, and were impacted by stigma as  
78 well as their perspectives on how to measure and intervene to reduce this stigma. This study will  
79 help design appropriate interventions and uplift the lifestyle of a cervical cancer survivor, hence  
80 accelerate the achievement towards Sustainable Development Goals.

81

## 82 **Methods**

### 83 **Study design and data collection**

84 The qualitative research design using focus group discussion (FGD) was used to explore the  
85 experiences of a cervical cancer survivor. Two FGDs were conducted, consisting of 8 members in  
86 one and 9 members in the other. The study was conducted from January 2019 to October 2019.  
87 An interview guide was prepared by an expert panel of faculty. The questionnaire consisted of  
88 open questions regarding personal experiences with cervical cancer, perceptions of what might  
89 have caused their cervical cancer, experience with any symptoms, Pap screening, diagnosis, and

90 treatment, and if there were any barriers experienced cervical cancer screening. FGD was  
91 conducted over 60-90 minutes. With the help of two moderators, the FGDs were conducted. All  
92 the participants were comfortable with Nepali language, hence Nepali language was used for the  
93 discussion. At first, information regarding sociodemographic factors was collected. All the  
94 discussion was audio tape recorded for further translation and transcriptions. Two facilitators also  
95 took field notes during the process and were discussed after the FGD. At first, information  
96 regarding demographic factors were collected. Similarly, all the participants were encouraged to  
97 share their knowledge, belief, and stigmata in society as experienced by them. To maintain  
98 confidentiality and privacy of the participant's information, it was ensure none other than the  
99 participants and the moderators attended the sessions.

## 100 **Participant selection**

101 The inclusion criteria were any cervical cancer survivors residing nearby BP Koirala Memorial  
102 Cancer Hospital who have completed the treatment. The cervical cancer patients who have been  
103 treated at BPKMCH were selected purposively and contacted via telephone. A total of 17  
104 participants who agreed to participate in the research were invited to BPKMCH for further study.  
105 BPKMCH is the only government cancer hospital with comprehensive cancer care, situated at  
106 Chitwan district, Nepal. It provides health care to the overwhelming majority of the cancer patients  
107 of Nepal.

## 108 **Data analysis**

109 The descriptive analysis of the socio-demographic characteristics of the survivors were done  
110 (Table 1). Following data collections, audio recorded were translated and transcribed from the  
111 Nepali language to the English language by two authors. Transcripts were examined line-by-line

112 and coded using themes as generated. The coding and thematic analysis were done using the  
113 Microsoft Office Excel sheets. The two authors were involved in data analysis and reporting to  
114 ensure the consistency of the data and the findings.

## 115 **Ethics approval and consent to participate**

116 The study protocol was approved by the Ethical Review Board of Nepal Health Research Council  
117 (Reg. No. 152/2019). All participants were explained about the research objectives, their expected  
118 role and the voluntary nature of participation. They were also informed that their decision to  
119 participate or decline participation would not affect any benefits or services received by them. A  
120 written informed consent (if literate) or thumb print in presence of witness (if illiterate) was  
121 obtained before participation in the study.

122

## 123 **Results**

### 124 **Socio-demographic characteristics of the survivors**

125 The mean age of the participants was 53 years (SD 10.8). of age ranging from 35 to 81 years. On  
126 average, the age of diagnosis of cervical cancer among the participants was 47 years (SD 8.7). In  
127 our study group, 88% of participants were married whereas 12% were widowed. Majority (70.6%)  
128 were Hindu by religion followed by Buddhism (23.5 %) and Christianity (5.9%). Most (64.7%) of  
129 the participants were illiterate. A quarter of the participants had the history of cancer in their family  
130 (Table 1).

131

132

133 **Table 1. Socio-demographic characteristics of participants.**

| Variables                       | Frequency | Percentage |
|---------------------------------|-----------|------------|
| <b>Age group (in years)</b>     |           |            |
| 35-50                           | 7         | 41.2       |
| 51-65                           | 9         | 52.9       |
| 66+                             | 1         | 5.9        |
| <b>Marital status</b>           |           |            |
| Married                         | 15        | 88.2       |
| Widowed                         | 2         | 11.8       |
| <b>Religion</b>                 |           |            |
| Hindu                           | 12        | 70.6       |
| Buddhist                        | 4         | 23.5       |
| Christian                       | 1         | 5.9        |
| <b>Level of education</b>       |           |            |
| Illiterate                      | 11        | 64.7       |
| Primary                         | 2         | 11.8       |
| Secondary                       | 4         | 23.5       |
| <b>Family history of Cancer</b> |           |            |
| Yes                             | 4         | 23.5       |
| No                              | 13        | 76.5       |

134

### 135 **Awareness of survivors about cervical cancer**

136 In each group, survivors were asked about their idea of how they might have acquired cervical  
137 cancer. All the survivors shared their knowledge about the cause of cervical cancer. The majority  
138 of the women responded that they truly have no idea regarding the cause of cervical cancer (Table  
139 2). Women described cancer as a painful experience they ever had. As one survivor stated,

140 *"... Look, I have no idea what is the cause behind my cervical cancer. It came out of nowhere. It*  
141 *was such a devastating time when I discovered I had cervical cancer. I thought I was dying. All I*  
142 *did was sit and ask myself why.... why it happened to me, did I do anything wrong?".... [60-year-*  
143 *old (3)]*

144 While the majority remained clueless, few of them came along with some ideas of how they might  
145 have acquired cervical cancer. The ideas about getting cervical cancer varied among individuals



146 and included fair skin color, short birth spacing, bearing too many children, unhealthy dietary  
 147 habits, smoking and chewing tobacco, use of homemade menstrual cloths. One of the survivors  
 148 even referred to the physical weakness in female as one of the causes of cervical cancer. When  
 149 they were further asked specifically if they knew about the human papillomavirus (HPV), most of  
 150 the survivors responded that they had never heard about the virus. Most of them did not know  
 151 about the virus as the main causative agent of cervical cancer, while two of them came to know  
 152 about the virus from their doctors after they discovered their cervical cancer.

153 **Table 2. Summary of survival reflection of the cause of cervical cancer.**

| Survivor reflections of causes of cervical cancer |                                                                                                                                                                                                                                                                   |
|---------------------------------------------------|-------------------------------------------------------------------------------------------------------------------------------------------------------------------------------------------------------------------------------------------------------------------|
| <u>Theme</u>                                      | <u>Representative quote</u>                                                                                                                                                                                                                                       |
| Fair skin color                                   | <i>"Well, I guess it is more common in fair women or you know like it may be due to short birth spacing. But exactly I don't know the cause of it [cervical cancer]." [46-year-old (16)]</i>                                                                      |
| Short birth spacing                               |                                                                                                                                                                                                                                                                   |
| Tobacco                                           | <i>"I heard somewhere that smoking and chewing tobacco causes cancer. Well, I don't have those habits still I got the cervical cancer. I know that smoking and chewing tobacco causes cancer but, I wonder what caused cancer in me...."</i><br>[45-year-old (7)] |
| Unhealthy diet                                    | <i>"I think that it [cervical cancer] is related to food. I mean to say that there must be something bad in the food we eat that predisposes us to cancer. Or you know, it may be due</i>                                                                         |
| Bearing too many children                         |                                                                                                                                                                                                                                                                   |

|                                  |                                                                                                                                                                                                                                                                                                                                                    |
|----------------------------------|----------------------------------------------------------------------------------------------------------------------------------------------------------------------------------------------------------------------------------------------------------------------------------------------------------------------------------------------------|
| Physically weak                  | <i>to bearing too many children. And also, women are physically weak which might be one of the reasons for us getting cancer." [62-year-old (15)]</i>                                                                                                                                                                                              |
| Use of homemade menstrual cloths | <i>"Growing up in a village, I did not have much knowledge about the health and sanitation. During my periods, I used homemade menstrual cloths. I guess I got cancer from those dirty pieces of cloths which I used during my periods. From my experience, I believe careless in menstrual hygiene causes cervical cancer." [59-year-old (4)]</i> |

154

## 155 **Symptoms they experienced prior to diagnosis**

156 **Episodes of vaginal bleeding.** All the survivors were enquired about the symptoms  
157 they experienced before they were diagnosed with cervical cancer. The majority of the women  
158 reported that they had episodes of unexplained vaginal bleeding. One of them even attributed the  
159 bleeding episode to hemorrhoids.

160 *"One day when I was in the bathroom, I saw blood in the pan, but falsely I attributed it to be from*  
161 *the hemorrhoids. I was not aware what that could mean, but to be safe I went to see a doctor.*  
162 *During my exam doctor told me that something isn't right and recommended me to undergo a*  
163 *cervical biopsy. After a couple of days, I found out I had cervical cancer. He [doctor] suggested*  
164 *me for the removal of my uterus which I was reluctant undergoing. Then I underwent an imaging*  
165 *test [MRI], and thanks to God my cancer had not spread to my surrounding organs [urinary*  
166 *bladder], and given the options I opted for the radiotherapy" [46-year-old (16)]*

167           **On and off abdominal pain.**           One of the women reported that she had on and off  
168 abdominal pain which she could not attribute to cervical cancer. She vividly recalled the event  
169 when she was diagnosed with cancer as devastating news for her.

170           *"Initially, I used to have pain, on and off, in my lower belly and I took medicine from the nearby*  
171 *pharmacy thinking it as a urinary tract infection. I don't remember for how long I had that*  
172 *[abdominal pain]. Later, I was advised to see a doctor. During an appointment he [doctor] told*  
173 *me my reports were concerning and after biopsy it turned out to be cervical cancer. The diagnosis*  
174 *hit me very hard. I felt my world spinning around me when I knew I had cancer. I cried a lot. I had*  
175 *no idea whether it is a genetic or something else."* [49-year-old (2)]

176           **Attributing vaginal bleeding to physiological changes.**   Many times women attributed  
177 their episodes of vaginal bleeding to the post-menopausal changes. Thinking bleeding as a  
178 physiological change that can occur at any time after they have reached menopause, many women  
179 did not seek immediate medical consultation.

180           *"At age 45, I had an episode of vaginal bleed and I discussed about it with my friends. They*  
181 *believed that this [vaginal bleed] is pretty much common after you attain menopause and there is*  
182 *no need for any medical consultation. But later, I had an episode of huge bleeding [from vagina]*  
183 *and I was totally scared. Fearing there might be something wrong going on, I went for the medical*  
184 *consultation right away. The doctor described me as I had some kind of wound in my cervix and*  
185 *urged me to undergo cervical biopsy. Later, the report came as a cervical cancer and I got*  
186 *operated and got my uterus removed."* [54-year-old (12)]

187           *"As far as I can remember, I did not bleed for long after I reached menopause. And suddenly out*  
188 *of nowhere, I started having vaginal bleeding. I used to see blood even while passing urine. It was*

189 *a hot weather which I believed was the reason behind my bleeding. It did not improve for long*  
190 *which made me worried. I went to meet the doctor. After all the examinations and tests like biopsy,*  
191 *it came out to be a cervical cancer." [81-year-old (6)]*

192 **Acute severe vaginal bleeding.** In addition to the above symptoms in which women  
193 did not seek immediate medical consultation, one of the women had heavy vaginal bleeding which  
194 brought her to the emergent medical attention and through this, her cervical cancer was diagnosed.  
195 *"I used to have lots of episodes of vaginal bleeding, which did not bother me initially. Later, I had*  
196 *a heavy bleeding episode and even had clots in the bleed. It was like blood everywhere. Then*  
197 *without thinking much, I decided to see a doctor. I was referred to a cancer specialist from local*  
198 *hospital. They [doctors] told me to get cervical biopsy right away and asked me to see them in a*  
199 *week. My son collected my reports later and opposite of what I expected the results came back as*  
200 *positive for cancer. That moment is indescribable." [60-year-old (3)]*

## 201 **Barriers to Pap screening**

202 Women were enquired about their experiences with the Pap screening before getting diagnosed  
203 with cervical cancer. Surprisingly, none of them ever had the screening with Pap smear before they  
204 were diagnosed with cervical cancer. All of them avoided screening in the past because of  
205 embarrassment or shame. As reported by them, women feel shy to expose their private parts to  
206 doctors.

207 *"Well, I have to say most of the women feel too shy to go for screening and expose their private*  
208 *parts to the medical professionals. Regarding me, I am not much comfortable with it, like, how*  
209 *can I show my private parts to the people other than my husband." [61-year-old (13)]*

210 *"To be honest (smiling), women are not comfortable showing their private parts to others. Even*  
211 *when we know about the medical camps in the nearby hospital or health post, we pretend to be*  
212 *fine if we were asked by someone else and avoid going for the screening programs...."* [45-year-  
213 old (7)]

214 Feeling healthy or having no symptoms at all was also mentioned to be one reason for women to  
215 not go for screening.

216 *"I had a very bad experience. Back in time about 10 years ago, a cervical screening camp was*  
217 *organized in our village. Without thinking much about it, I did not go there for screening, as I was*  
218 *feeling well and believed nothing could be wrong going with me. But what I did was a mistake.*  
219 *Later I got cancer and had to undergo surgery. If I had been careful enough and had undergone*  
220 *the routine screening process, I could have avoided surgery and all the difficulties associated with*  
221 *it. I am also a political leader in my ward so, I conducted a survey and you will be surprised*  
222 *knowing that 72 out of 100 females did not have their routine screening done."* [59-year-old (4)]

### 223 **Cervical cancer in Nepalese society**

224 Women were enquired about how their family members and society treated them after knowing  
225 that she had cervical cancer. The responses we got varied among individuals. Some of them were  
226 well treated by their family and society, while others endured the stigma associated with cervical  
227 cancer. The majority of the participants believed that even in present-day cervical cancer is  
228 stigmatized in the Nepalese society because of the misconceptions people have towards cancer as  
229 a whole (Table 3).

230 **Table 3. Summary of the stigma related to cervical cancer.**

| Stigma related to cervical cancer |                                |                               |
|-----------------------------------|--------------------------------|-------------------------------|
| <u>Drivers of stigma</u>          | <u>Manifestation of stigma</u> | <u>Consequences of stigma</u> |
| Cancer as a death                 | Physical or social isolation   | Loss of social support        |
| Cancer is contagious              | Verbal abuse                   |                               |
|                                   | Self-stigma of fear            |                               |

231

232           **Drivers of stigma.**     According to the women, the general themes acting as the driving  
233 factors for cancer stigma in society are the people’s perception of cancer as an ultimate death result  
234 and cancer as a communicable disease. Cancer as a whole is stereotyped as an ultimate death and  
235 contagious in society and despite providing clear information by the affected person, most of the  
236 time it was hard to change their views. It is due to the lack of clear information regarding cancer,  
237 such beliefs do exist in society. As the respondents mentioned,

238     *“When the people in my neighborhood knew I had cervical cancer, they all [neighbors] believed*  
239 *that it [cervical cancer] is a communicable disease and thought like you know, cancer is incurable,*  
240 *I am not going to live for long.” [60-year-old (3)]*

241     *“The very first thing I used to hear from them [relatives] was “You are going to die soon from the*  
242 *cancer”. In return I used to give them the information about my disease and say that this is curable*  
243 *and I would be fine. But they did not believe me.” [47-year-old (7)]*

244           **Manifestation of stigma.**     The fear that existed among the society members that it can  
245 be transmitted via casual close contact and communication lead to the physical isolation or  
246 marginalization of the cancer patients in their family as well as in the society. According to  
247 respondents, neighbors started avoided coming close to them or inviting them in social events, and

248 even verbally abused and pitied them. Most of the time, they felt that they were hated by society  
249 just because they had cancer. They mentioned how physical isolation and marginalization resulted  
250 in the loss of their social support.

251 *"When I was undergoing chemotherapy for my cancer, my neighbors stopped coming near to me*  
252 *thinking that they would get cancer from me. Even my family members wore mask when they had*  
253 *to come near me."* [60-year-old (3)]

254 *"Back in our time, people from our village used to take cancer in a very negative way. When I got*  
255 *cancer, they [villagers] didn't even allow me to go near them and used to say "go away" if I*  
256 *attempted to do so."* [81-year-old (6)]

257 *"I had a very hard time dealing with my diagnosis of cervical cancer. That was the first time*  
258 *anyone outside my family came to see me and pitied me. During my chemotherapy, I lost my hair*  
259 *and my neighbors believed it was happening due to my cancer. I don't know why but they*  
260 *[neighbors] always gave me disgusting look when I said I am undergoing radiotherapy. I felt like*  
261 *everyone hated me."* [47-year-old (7)]

262 **Self-stigma of fear associated with cancer.** The fear related to cancer and its  
263 treatment also existed in those living with cancer. Due to the negative connotations of cancer,  
264 women having cancer often feared to undergo the treatment. As one of the respondents mentioned,  
265 *"Initially I was reluctant to undergo the treatment of my cancer [cervical cancer], as one my friend*  
266 *told me not to go for treatment as the cancer will eventually kill me and also the radiotherapy is*  
267 *very difficult to undergo. Later I met a woman with cervical cancer who encouraged me to undergo*  
268 *treatment. After hearing her experience my perspective towards chemotherapy and radiotherapy*  
269 *changed. Meeting her eased my fears. I am grateful that I met her, otherwise I would not have*

270 *gone for the treatment and only God would know what would have happened to me...hahaha....."*

271 [40-year-old (10)]

272 **Social support and family encouragement.** According to them, the love, care, and  
273 support they got from their family and friends were the key elements for them to fight cancer and  
274 stay optimistic through the journey of cancer.

275 *"I had a very good support from my friends and family (smiling). They treated me very well when*  
276 *I got cancer and was undergoing treatment. I am so glad that they were all so supportive and with*  
277 *me when I needed them the most."* [46-year-old (16)]

278 *"My family looked after me very nicely. I can't say enough about them who cared for me during*  
279 *my hard time. Now, I love them more than ever. They are the most important person in my life."*  
280 [45-year-old (1)]

281 *"Yes, family support played a great role in my survival. I do not have enough words to express my*  
282 *gratitude for the care, help and love I got from them. They were always by my side I needed them."*  
283 [59-year-old (4)]

284 According to a few respondents, society's perception overturned with time as they saw the patients  
285 with cervical cancer doing well with the treatment and also with the increasing awareness via  
286 media. As one of the survivors stated,

287 *"At present, the situation is quite different than the previous one. With the awareness arising from*  
288 *the media and campaigns, their perspective towards cancer changed. Now they [society] feel*  
289 *ashamed of how they previously treated cancer patients. These day people are very supportive*  
290 *towards the cancer patients....."* [81-year-old (6)]



## 291 **Unexpected misconceptions**

292 A few uncommon views regarding the cancer were identified from our interview. People have few  
293 misconceptions regarding the type of food they should take and the use of herbal medicine. They  
294 avoided a certain type of food during their period of cancer. One of the survivors avoided meat  
295 and eggs, while one patient consumed only pulses, milk, and fruits. Among them, one took some  
296 herbal medicines recommended by her friend, which she does not know about.

297 *"I did not like to eat for a month. I just eat pulses, soups, milk and fruits only during my treatment.*  
298 *Sometimes I used to panic a lot and pray to god for my survival. I believe I would not survive if*  
299 *God was not there....."* [60-year-old (3)]

300 *"I did not eat meat for 1 year and also the eggs....."* [61-year-old (13)]

301 *"One of my neighbors was diagnosed with some serious disease, I don't know exactly what it was,*  
302 *but I know is she was doing fine by taking some herbal medicines. She named about 13 types of*  
303 *herbal medicines she was taking. Seeing her I also started taking those [herbal meds] on daily*  
304 *basis. I believe that also gave great benefits to my health."* [53-year-old (11)]

## 305 **Message of the survivors**

306 The majority of the women did not go for the Pap screening for cervical cancer, and also after  
307 being diagnosed few of them were reluctant to undergo treatment. However, though lately, but  
308 with their own experiences with cancer, they realized the importance of screening methods for  
309 early detection and treatment of cervical cancer.

310 *"I heard about one cancer patient who did not undergo radiation therapy because of all the*  
311 *negative comments she heard about radiotherapy, its complications. I don't know where she is*

312 *now. That is certainly a mistake. Please don't do that, please go and get your treatment before it*  
313 *is a delay so that you don't have to regret it forever."* [51-year-old (8)]

314 *"Today I am living a new life. For those women out there who are healthy, I suggest them to go*  
315 *for screening regularly. And to those living with cervical cancer, don't worry much about it. Yes,*  
316 *cancer is a disease but is not always a killer; they can be cured with treatment."* [60-year-old (3)]

317 Thus, they advised other healthy women to undergo regular screening for early detection and  
318 undergo treatment if they are diagnosed case of cervical cancer.

319

## 320 **Discussion**

321 This qualitative study done to explore the experiences of cervical cancer survivors is the first of  
322 its type that had been conducted in Nepal. Survivors expressed their perspectives of cervical cancer  
323 and its cause, symptoms they had a prior diagnosis, their cervical cancer screening behavior,  
324 personal and social consequences they had faced after the diagnosis. The majority of the  
325 participants had scant information about cervical cancer. They delivered various ideas of how they  
326 might have acquired cervical cancer, and when specifically inquired about the human  
327 papillomavirus they responded that they had never heard about the virus before and can't relate the  
328 virus to the development of cervical cancer. The majority of participants had not undergone the  
329 regular Pap screening before diagnosis, and many had not screened at all. The main barrier to  
330 screening as reported was the fear of embarrassment that results from showing their private parts  
331 to the medical professionals and having no symptoms at all. The majority of survivors had  
332 persistent symptoms before they got diagnosed with cervical cancer. Despite having symptoms for

333 long, they shockingly showed delayed healthcare-seeking behavior. Although all survivors did not  
334 face the stigma related to cervical cancer, the majority of them endured the stigma for long in the  
335 form of physical or social isolation and verbal abuse. Though lately but eventually the survivors  
336 recognized the importance of the early Pap screening and treatment of cancer. Thus, many  
337 survivors urged other healthy women to get screened regularly and go for the treatment if they  
338 already had it.

339 Several findings can be derived from the study. First, the women we did an interview with had  
340 scant information about cervical cancer. While few of them related their cancer to some of the  
341 factors, the majority of them had no idea what the cause of cervical cancer in them is. Almost all  
342 of them never heard about human papillomavirus (HPV) before and had no clue that it can cause  
343 cervical cancer. Among the participants, 64.7% of the women are illiterate and illiteracy is perhaps  
344 the reason behind their lack of knowledge about cervical cancer. Several other studies in Nepal  
345 reported a lower level of knowledge in women about cervical cancer. For example, in a study in  
346 Rukum, Nepal only 5% of the 600 participants had ever heard about cervical cancer and only 30%  
347 among themselves were able to relate HPV as its causative agent [6]; in a study in Eastern Nepal,  
348 only 21.5% of women could identify HPV as a causative agent of cervical cancer [7], and in  
349 another study in rural Nepal 76.24% (1928) of women did not know anything about cervical cancer  
350 [8]. A similar finding was present in a study among cervical cancer survivors in North Carolina,  
351 USA [9]. The study in Rukum, Nepal articulated a lower level of knowledge about cervical cancer  
352 in women to their low level of education and lower monthly income [6]. This highlights the  
353 importance of implementing educational programs and campaigns to educate women and make  
354 them aware of cervical cancer.

355 Second, the barriers to cervical cancer screening identified from the study are feeling well or  
356 having no symptoms at all and the fear of embarrassment that results from showing their private  
357 parts to the health professionals. In addition to this, other studies in Nepal identified illiteracy  
358 [6,10,11], lack of awareness about cervical cancer and its screening methods, embarrassment,  
359 having no symptoms at all [12,13], fear of finding out cancer [8], sociocultural barriers, service  
360 providers' behavior, geographical challenges, poor financial condition [13] as a significant barrier  
361 to cervical cancer screening uptake behavior, while living in a rural area [11], participating in  
362 awareness program, support from family and women's group [13] act as a facilitator to increase  
363 the screening uptake in women. Similarly, a cross-sectional study in Morocco also reported poor  
364 awareness in women about cervical cancer and have no symptoms at all as a cause for poor Pap  
365 screening uptake practice [14]. Moreover, stigma related to cervical cancer was identified as a  
366 barrier to cervical cancer screening in Karnataka, India [15], and poor finances and lack of  
367 insurance, sense of well-being, transportation issues and dissatisfaction with the behavior of  
368 service provider were some issues related to poor screening behavior among survivors in North  
369 Carolina, USA [9]. Prior bad experiences with the detection of cancer were also described as a  
370 barrier to cervical cancer screening among older African American and Hispanic urban women  
371 [16].

372 The findings suggested the need for interventions at multiple levels to increase the screening  
373 uptake behavior in women. First, women should be educated and made aware of the importance  
374 of screening, whether they have symptoms or not, and how early detection and treatment can  
375 significantly prevent cervical cancer. Second, there seems a need for organized cervical cancer  
376 screening programs in Nepal to make it accessible to women in all the geographical areas and  
377 cheap enough to make them affordable. Awareness programs via media, mass campaigns,

378 healthcare professionals all can equally increase the screening uptake behavior in women. As been  
379 reported in the literature, educating women about the importance of screening had shown an  
380 increase in the willingness to participate in such programs [17,18]. Using the newer information  
381 technologies, like using the reminders and messages via the cellphones [19] or involving the social  
382 media influencers or key opinion leaders [20] for increasing awareness have shown to increase the  
383 participation of women in cervical cancer screening. A similar use of the latest technology in social  
384 media can be implemented in Nepal for increasing the awareness.

385 Third, the majority of women experienced episodes of unexplained vaginal bleeding which  
386 persisted for long before the diagnosis. Though they had easy access to health care (being residents  
387 of urban areas), the majority demonstrated delayed healthcare-seeking behavior. As this study  
388 indicates, the women's sense of well-being and inability to relate their symptoms to a possible  
389 serious disease or attributing their symptoms to normal physiological changes like menopause  
390 possibly explain their delayed healthcare-seeking behavior. Similarly, delayed healthcare-seeking  
391 behavior despite persistent symptoms was also noted in cervical cancer survivors in North Carolina  
392 [9]. On the other hand, some studies articulated the delayed healthcare seeking to the stigma related  
393 to cervical cancer [15]. This behavior seems concerning as this frequently leads to delayed  
394 presentation to medical attention thus, leading to delayed diagnosis and treatment which can  
395 increase the negative impact of disease in affected individuals. The women should be educated  
396 about the fact that the sense of well-being does not ensure everything is going alright in them and  
397 should never be used to rule out the need for routine screening measures or medical consultation.  
398 Women should be educated about the symptoms related to cancer, encouraged to seek medical  
399 care when they become aware of any symptoms related to cancer. Likewise, effective

400 communication seems important between the health-care providers, policymakers, and the public  
401 via educational programs, media to improve the knowledge about cancer in women.

402 Fourth, even in today's modern era, cervical cancer is still being stigmatized and misunderstood  
403 in our society. It is quite surprising that despite being such a highly prevalent disease, the public  
404 has scant information, misunderstood, and has different perspectives about cervical cancer. The  
405 misconceptions regarding cervical cancer seem to originate and keep perpetuating the stigma  
406 related to it. Our study revealed that pertaining cervical cancer to ultimate death and fear of  
407 transmission assuming it as a communicable disease are the driving factors for the origin of stigma.  
408 Similar perceptions, cancer as a communicable disease and leads to ultimate death, driving the  
409 stigmas related to cervical cancer are also described on a qualitative study of stigma related to  
410 cervical and breast cancer in Karnataka, India [15] and a study on stigma related to cervical cancer  
411 among women in Brazil [21]. Furthermore, the mind of the people being so constantly preoccupied  
412 with the thoughts and ideas of blaming or attributing cervical cancer to the individual's  
413 promiscuous sexual behavior, like sleeping with multiple men, or relating it to sexually transmitted  
414 disease [21] or blaming cervical cancer as a punishment to individual's bad deeds/transgressions,  
415 like assuming they must have done something wrong [15], it naturally rooted the stigma related to  
416 cervical cancer. Blaming cervical cancer to the promiscuous sexual behavior was also described  
417 as a driving factor in a qualitative study to identify the social stigma among cervical cancer  
418 survivors in American society [22] and an experimental study to explore the knowledge of HPV  
419 link to cervical cancer and stigma in Florida, America [23]. A study in Zambia also found that  
420 women perceived cervical cancer as an ultimate death and blamed cervical cancer to the  
421 promiscuous sexual behavior [24].

422 The stigmas associated with cancer manifested in various forms in the communities and women  
423 had to endure the discrimination and negative impacts arising because of it. Although all the  
424 women were not the victim of stigma, majority of the interviewees described the enacted stigma  
425 as discrimination in the form of social isolation or marginalization ranging from no longer coming  
426 in close contact to the person with cancer, inviting them to participate in social events to use of  
427 masks from the family members while coming in contact to them. Verbal stigma was also  
428 described as offensive remarks towards cancer patients like “do not try coming near to me, go  
429 away”, “you are going to die soon from cancer”. Other studies have also described similar  
430 manifestations of stigmatization. The physical or social isolation and verbal abusive comments  
431 had also been described in a study in Karnataka, India [15], and in a study on cervical cancer  
432 stigma in rural Kenya [25].

433 Unsurprisingly, the stigmatization has negative impacts on cancer patients on both personal and  
434 social levels. Interviewees reported how the marginalization of them from society led to the loss  
435 of their social support. A study in Karnataka, India described how the diagnosis of cervical cancer  
436 generated a fear inside a cancer patient and their kin whether to disclose their diagnosis to others  
437 or not and how they held revelation of the diagnosis within their close family members only. The  
438 stigmas related to cervical cancer was a potential barrier to screening and led to delayed healthcare-  
439 seeking behavior among women having symptoms [15]. As described in a study done in America  
440 women felt guilt, embarrassment, and shame as a result of their cervical cancer diagnosis, and  
441 generated a fear inside them about being misjudged by the society upon disclosure of diagnosis,  
442 and how it led to the loss of social support [22]. A study in Canada described the discriminative  
443 behaviors towards cancer (of any type) survivors in their workplace like discrimination while  
444 hiring, harassment, bullying, demotivating them to quit their job, or retire early [26]. Though

445 workplace discrimination is not explored in this study, cervical cancer survivors may face the same  
446 consequences in their workplace.

447 The study adds to the body of research seeking a broader understanding of stigma and its impact  
448 on women's personal and social life. As reported by few respondents that with time when the  
449 cervical cancer patient got better with treatment, it overturned the thoughts and beliefs of most  
450 people towards the stigma related to it. Thus, it shows the importance and needs to implement the  
451 awareness programs at an individual and community level to change the way cancer is stereotyped  
452 in society.

453 Lastly, the survivors, though lately, but realized the importance of regular screening in early  
454 detection and treatment of cancer, and changed their perspective towards cancer. Almost all  
455 survivors urged other women to seek medical care when they had any concerning symptoms.  
456 Cancer is a devastating diagnosis to face and digest and can scare anyone. Forming a group of  
457 survivors and providing an opportunity for cancer patients to interact with them can ease resolve  
458 the fear of cancer and encourage them to opt for the treatment.

### 459 **Study strength and limitation**

460 **Strength.** This is the first study conducted in Nepal in an attempt to explore the experiences  
461 and perspectives of cervical cancer survivors. The qualitative study design itself is the strength of  
462 this study. By using this qualitative approach, we were able to assemble the comprehensive  
463 understandings of the survivor's perspective of cervical cancer and their journey through this  
464 cancer. The conclusion drawn from this study can add a vital element in this research area which  
465 can help improve and modify accordingly the awareness campaigns and health care policies, that  
466 will implement soon.



467 **Limitation.** The study findings cannot be generalized as the chosen sample for the study is  
468 purposive and from Chitwan district only and does not reflect the entire female population of  
469 Nepal. The knowledge, experiences, and stigma women endured through in the urban settings may  
470 be different compared to those experienced by women in the rural setting. We interviewed only  
471 those who are alive and volunteered to share their story with us. It would add much more flavor in  
472 our study if we add the perspectives of the community and women living with cervical cancer.

473

## 474 **Conclusions**

475 This study demonstrated poor awareness about cervical cancer, delayed healthcare-seeking  
476 behavior, and the stigma related to cervical cancer. Thus, there is an urgent need of intervening at  
477 multiple levels, at the community level to make women and the public aware of cervical cancer to  
478 the federal level for launching effective health education campaigns and making policies for  
479 cervical cancer prevention programs. Additionally, the survivors should be included as an integral  
480 part of the health policy formation. The implementation of such programs may save the lives of  
481 hundreds of women and overturn people's perspective towards cervical cancer thus, saving women  
482 from going through all the negative experiences related to cervical cancer. This study also  
483 recommends more qualitative studies with the cervical cancer survivors in both urban and rural  
484 settings to gain their perspectives, knowledge, experiences, and attitudes about it and add them to  
485 our research.

486

## 487 **Acknowledgments**

488 We would like to thank all the cervical cancer survivors and their accompanying persons for  
489 their generous contribution in this research. We would also like to thank Dr. Krishna Subedi,  
490 Ayodhya Pathak, Manju Sharma, Tara Dawadi and Kamala Adhikari for their support.

491

## 492 **References**

- 493 1. Arbyn M, Weiderpass E, Bruni L, Sanjosé S de, Saraiya M, Ferlay J, et al. Estimates of  
494 incidence and mortality of cervical cancer in 2018: a worldwide analysis. *Lancet Glob*  
495 *Heal.* 2020;8: e191–e203. doi:10.1016/S2214-109X(19)30482-6
- 496 2. Centers for Disease Control and Prevention. Cervical cancer. U.S. Dept. of Health and  
497 Human Services, Centers for Disease Control and Prevention. 2009 [cited 3 May 2020].  
498 Available: <http://www.cdc.gov/cancer/cervical/>
- 499 3. ICO/IARC. Nepal: Human Papillomavirus and Related Cancers, Fact Sheet. 2018 [cited  
500 16 Mar 2020]. Available: [https://hpvcentre.net/statistics/reports/NPL\\_FS.pdf](https://hpvcentre.net/statistics/reports/NPL_FS.pdf)
- 501 4. Siegel RL, Miller KD, Jemal A. Cancer statistics, 2016. *CA Cancer J Clin.* 2016;66: 7–30.  
502 doi:10.3322/caac.21332
- 503 5. Ferrandina G, Mantegna G, Petrillo M, Fuoco G, Venditti L, Terzano S, et al. Quality of  
504 life and emotional distress in early stage and locally advanced cervical cancer patients: a  
505 prospective, longitudinal study. *Gynecol Oncol.* 2012;124: 389–394.  
506 doi:10.1016/j.ygyno.2011.09.041
- 507 6. Khadka K, Shah SK, Ts S, Mathias J, Upadhayay A. Knowledge and Awareness about  
508 Cervical Cancer Screening and HPV Vaccine among Females Aged 15-49 Years in

- 509 Rukum District of Nepal. *Am J Cancer Prev.* 2017;5: 10–16. doi:10.12691/ajcp-5-1-2
- 510 7. Bhatta MP, Johnson DC, Lama M, Maharjan B, Lhaki P, Shrestha S. Cervical Cancer and  
511 Human Papillomavirus Vaccine Awareness Among Married Bhutanese Refugee and  
512 Nepali Women in Eastern Nepal. *J Community Health.* 2019;45: 516–525.  
513 doi:10.1007/s10900-019-00770-2
- 514 8. Shrestha A. Awareness of cervical cancer and screening among rural Nepalese women. *J*  
515 *Clin Oncol.* 2017;35: 1553–1553. doi:10.1200/jco.2017.35.15\_suppl.1553
- 516 9. Richman AR, Troutman JL, Torres E. Experiences of Cervical Cancer Survivors in Rural  
517 Eastern North Carolina: a Qualitative Assessment. *J Cancer Educ.* 2016;31: 314–321.  
518 doi:10.1007/s13187-015-0809-0
- 519 10. Acharya Pandey R, Karmacharya E. Cervical cancer screening behavior and associated  
520 factors among women of Ugrachandi Nala, Kavre, Nepal. *Eur J Med Res.* 2017;22: 1–9.  
521 doi:10.1186/s40001-017-0274-9
- 522 11. Ranjit A, Gupta S, Shrestha R, Kushner AL, Nwomeh BC, Groen RS. Awareness and  
523 prevalence of cervical cancer screening among women in Nepal. *Int J Gynecol Obstet.*  
524 2016;134: 37–40. doi:10.1016/j.ijgo.2015.11.019
- 525 12. Thapa N, Maharjan M, Petrini MA, Shah R, Shah S, Maharjan N, et al. Knowledge,  
526 attitude, practice and barriers of cervical cancer screening among women living in mid-  
527 western rural, Nepal. *J Gynecol Oncol.* 2018;29: 1–12. doi:10.3802/jgo.2018.29.e57
- 528 13. Darj E, Chalise P, Shakya S. Barriers and facilitators to cervical cancer screening in  
529 Nepal: A qualitative study. *Sex Reprod Healthc.* 2019;20: 20–26.

- 530           doi:10.1016/j.srhc.2019.02.001
- 531   14.   Belglaiiaa E, Souho T, Badaoui L, Segondy M, Prétet JL, Guenat D, et al. Awareness of  
532           cervical cancer among women attending an HIV treatment centre: A cross-sectional study  
533           from Morocco. *BMJ Open*. 2018;8. doi:10.1136/bmjopen-2017-020343
- 534   15.   Nyblade L, Stockton M, Travasso S, Krishnan S. A qualitative exploration of cervical and  
535           breast cancer stigma in Karnataka, India. *BMC Womens Health*. 2017;17: 1–15.  
536           doi:10.1186/s12905-017-0407-x
- 537   16.   Guilfoyle S, Franco R, Gorin SS. Exploring older women’s approaches to cervical cancer  
538           screening. *Health Care Women Int*. 2007;28: 930–950. doi:10.1080/07399330701615358
- 539   17.   Shakya S, Karmacharya BM, Afset JE, Bofin A, Åsvold BO, Syversen U, et al.  
540           Community-Based Health Education has Positive Influence on the Attitude to Cervical  
541           Cancer Screening among Women in Rural Nepal. *J Cancer Educ*. 2016;31: 547–553.  
542           doi:10.1007/s13187-015-0863-7
- 543   18.   Alemrayat B, Abu-Abbas R, Al-Naemi M, AlTwaishi O, Saibi W, Zaheer R, et al. Cervical  
544           Cancer Awareness Campaign in Qatar: A Population-Based Campaign. *J Glob Oncol*.  
545           2018;4: 26s-26s. doi:10.1200/jgo.18.69500
- 546   19.   Zhang D, Advani S, Waller J, Cupertino AP, Hurtado-De-Mendoza A, Chicaiza A, et al.  
547           Mobile technologies and cervical cancer screening in low- And middle-income countries:  
548           A systematic review. *JCO Glob Oncol*. 2020;6: 617–627. doi:10.1200/JGO.19.00201
- 549   20.   Ma I-G, Wang C-A, Chen C-H. New Approaches on Cervical Cancer Prevention  
550           Campaign For the Young Women. *J Glob Oncol*. 2018;4: 146s-146s.

551 doi:10.1200/jgo.18.55900

552 21. Gregg JL. An Unanticipated Source of Hope: Stigma and Cervical Cancer in Brazil. *Med*  
553 *Anthropol Q.* 2011;25: 70–84. doi:10.1111/j.1548-1387.2010.01137.x

554 22. Dyer K. 2010 P. K. new award from cancer to sexually transmitted infection: Explorations  
555 of social stigma among cervical cancer survivors. *Hum Organ.* 2010;69: 321–330.

556 doi:10.17730/humo.69.4.a750670h0784521j

557 23. Shepherd MA, Gerend MA. The blame game: Cervical cancer, knowledge of its link to  
558 human papillomavirus and stigma. *Psychol Heal.* 2014;29: 94–109.

559 doi:10.1080/08870446.2013.834057

560 24. White HL, Mulambia C, Sinkala M, Mwanahamuntu MH, Parham GP, Moneyham L, et  
561 al. “Worse than HIV” or “not as serious as other diseases”? Conceptualization of cervical  
562 cancer among newly screened women in Zambia. *Soc Sci Med.* 2012;74: 1486–1493.

563 doi:10.1016/j.socscimed.2012.01.028

564 25. Rosser JI, Njoroge B, Huchko MJ. Changing knowledge, attitudes, and behaviors  
565 regarding cervical cancer screening: The effects of an educational intervention in rural

566 Kenya. *Patient Educ Couns.* 2015;98: 884–889. doi:10.1016/j.pec.2015.03.017

567 26. Stergiou-Kita M, Pritlove C, Kirsh B. The “Big C”—stigma, cancer, and workplace  
568 discrimination. *J Cancer Surviv.* 2016;10: 1035–1050. doi:10.1007/s11764-016-0547-2

569
